1 **Title page**

2

3 **Risk of plague transmission from human cadavers: a systematic review**

4

5 **Short title:** Plague transmission from human cadavers

6

7 Sophie Jullien<sup>1,2\*</sup>, Nipun Lakshitha de Silva<sup>3</sup>, Paul Garner<sup>1</sup>

8

9 <sup>1</sup> Cochrane Infectious Diseases Group, Liverpool School of Tropical Medicine,  
10 Liverpool, United Kingdom

11 <sup>2</sup> Barcelona Institute for Global Health (ISGlobal), Hospital Clínic, University of  
12 Barcelona, Barcelona, Spain

13 <sup>3</sup> Department of Clinical Sciences, General Sir John Kotelawala Defence  
14 University, Colombo, Sri Lanka

15 \* Corresponding author

16 E-mail: [sophjullien@gmail.com](mailto:sophjullien@gmail.com)

17

18 **Keywords:** plague; *Yersinia pestis*; outbreak; cadaver; body fluids

## 19 **Abstract**

20 Plague can be fatal. Ebola has raised concern of the risk of infection from  
21 bodies of people that have died from other dangerous infectious diseases. We  
22 sought to estimate the risk of human remains from someone who was infected  
23 with plague transmitting *Yersinia pestis*. With no clear direct evidence, we  
24 developed a causal chain and carefully searched and assessed the literature at  
25 each step: we assessed the infectiousness of body fluids of people ill with  
26 plague; we sought for reported infection acquired from human and animal  
27 cadavers; and examined evidence of body fluid infectiousness of cadavers,  
28 seeking any information about the length of infectiousness. We concluded that  
29 pneumonic plague can occur after intense manipulation of the cadaver,  
30 presumably from inhalation of respiratory droplets; and that bubonic plague can  
31 occur after contact with infected blood in people with skin cuts or abrasions.  
32 Establishing a quantitative measure of risk was not possible from the evidence  
33 available.

## 34 **Author summary**

35 Plague is an infectious disease that is of particular concern due to its high risk  
36 for human outbreaks. Understanding the level and duration of infectiousness of  
37 the body of someone who was infected with plague is essential to establish  
38 adequate preventive measures while handling corpses. We found limited  
39 evidence that human cadavers who have died from plague remain infectious,  
40 both from inhalation of particles generated by handling and by direct skin  
41 contact.

## 42 **Introduction**

43 Plague is an ancient disease that has killed millions in the past [1]. Plague  
44 remains a current threat in many parts of the world [2], and was categorized by  
45 the World Health Organization (WHO) as a re-emerging disease [3]. Caused by  
46 *Yersinia pestis*, a non-motile gram-negative coccobacillus, the disease is a  
47 zoonosis with rodents as the main reservoir [4,5], and is transmitted to human  
48 by infected rodent fleas, although it can also be transmitted by bites from  
49 infected animals and by handling, ingestion, and inhalation of aerosolized  
50 droplets from infected tissues, animals or humans (Fig 1) [6–10].

51 Plague may present as bubonic plague, with lymph nodes inflammation  
52 following a flea bite or scratch from an infected animal [11,12]; pneumonic  
53 plague from inhalation of droplets from infected humans or animals; or  
54 septicaemic plague, from the hematogenous spread of bubonic or septicaemic  
55 plague [13]. The question as to whether dead bodies are infectious has become  
56 current, with the Ebola outbreak heightening concerns. Very little is known  
57 about how contagious human cadavers are and for how long, and by which way  
58 transmission can occur - and often relatives may use no protection in traditional  
59 funeral rituals. Plague transmission from an infected human cadaver can  
60 possibly occur through three routes: contact with infectious body fluids directly  
61 (through skin or inhalation) or indirectly (through contaminated clothing), or bites  
62 from infected fleas from the cadavers (on the body or in the clothes). In this  
63 review, we aimed to estimate the risk of plague-infected human cadavers  
64 transmitting *Y. pestis* through infectious body fluids to help a WHO Guideline  
65 Group make recommendations for protective personal equipment for health  
66 workers. As we anticipated that direct evidence from human cadavers is

67 lacking, we developed the approach through a logic framework (Fig 2) and a full  
68 protocol prepared in advance (registered in Prospero [14]), with three review  
69 parts: infectiousness of different body fluids of people ill with plague (part 1);  
70 reported infection acquired from human and animal cadavers (part 2); and  
71 evidence of body fluid infectiousness of animal or human cadavers, including  
72 length of cadaver infectiousness (part 3).

73

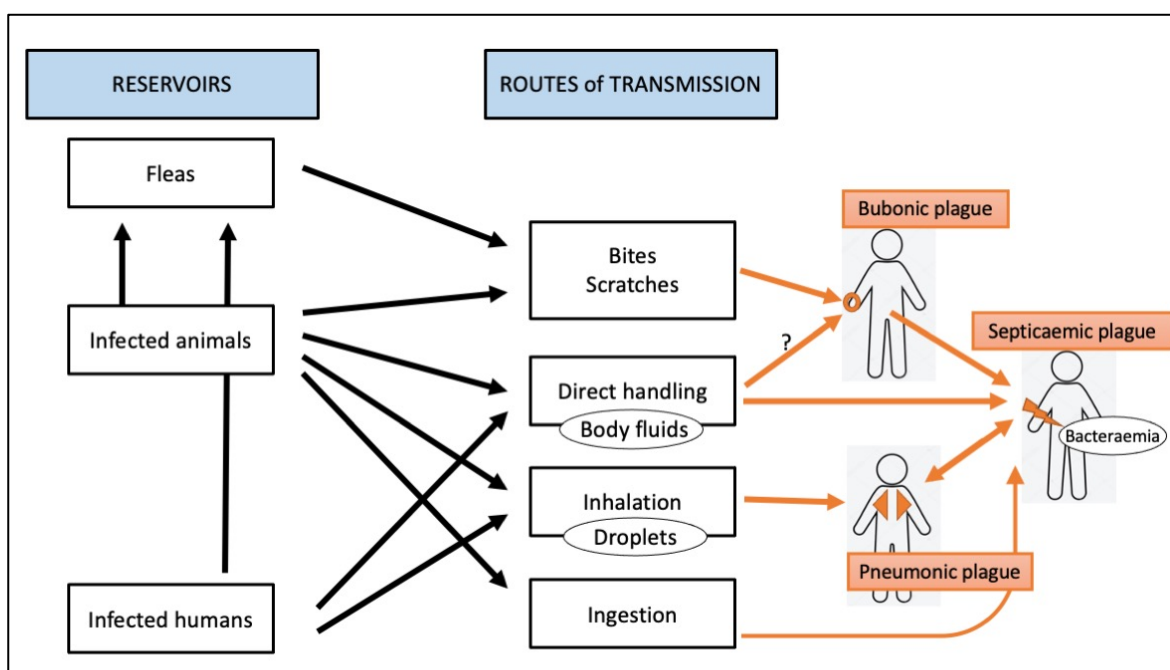

74

75 **Fig 1. Reservoirs of *Y. pestis* and routes of transmissions leading to the**  
76 **different forms of plague**

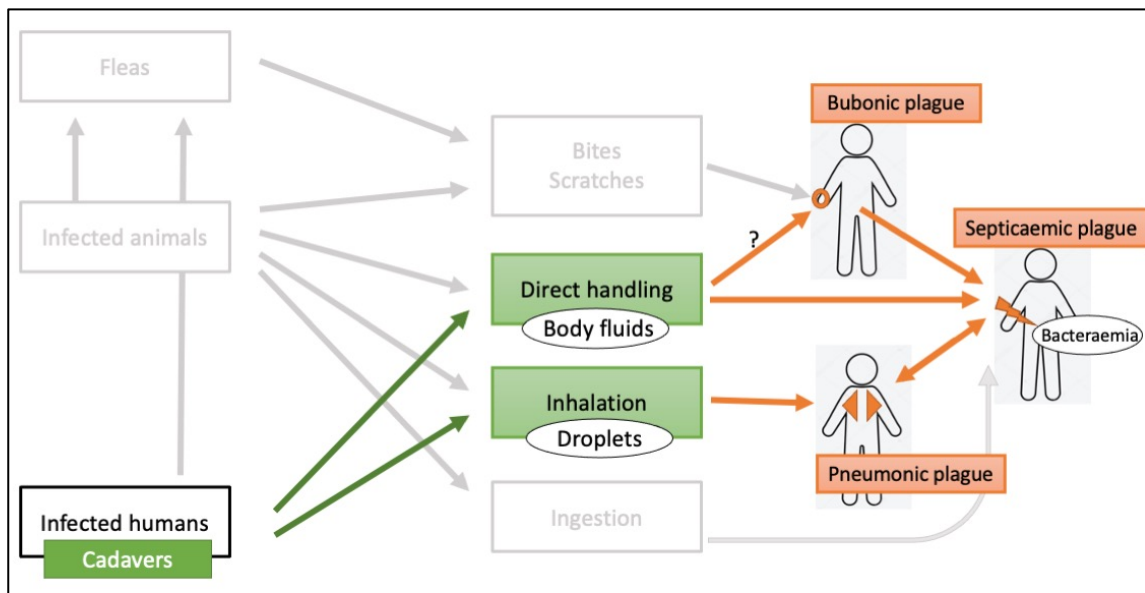

77

78 **Fig 2. Potential transmission routes from human cadavers**

79 **Methods**

80 For each of the three parts, we developed inclusion criteria (Table 1). We  
81 excluded cases where plague infection was clearly attributed to consumption of  
82 infected meat, as we estimated that the risk of infection acquired from  
83 consumption of human cadavers was unlikely. We also excluded cases of  
84 vector transmission such as fleas.

85

86 **Table 1.** Inclusion criteria for the three parts of the review

|                           | <b>Part 1. Infectiousness of body fluids of people ill with plague</b>                                                      | <b>Part 2. Infection acquired from human and animal cadavers</b>                                                                           | <b>Part 3. Body fluid infectiousness of animal or human cadavers, including length of cadaver infectiousness</b>                                                                                                                                                                                                                                                                                                                                                                                                                                                              |
|---------------------------|-----------------------------------------------------------------------------------------------------------------------------|--------------------------------------------------------------------------------------------------------------------------------------------|-------------------------------------------------------------------------------------------------------------------------------------------------------------------------------------------------------------------------------------------------------------------------------------------------------------------------------------------------------------------------------------------------------------------------------------------------------------------------------------------------------------------------------------------------------------------------------|
| <b>Types of study</b>     | Descriptive studies including surveillance data, case series and case reports                                               | Descriptive studies including case series and case reports                                                                                 | Descriptive studies including case series and case reports                                                                                                                                                                                                                                                                                                                                                                                                                                                                                                                    |
| <b>Participants</b>       | People with confirmed plague                                                                                                | People or animal that have died from confirmed plague                                                                                      | People or animal that have died from confirmed plague                                                                                                                                                                                                                                                                                                                                                                                                                                                                                                                         |
| <b>Outcomes</b>           | New case of human with confirmed plague attributed to direct transmission from infected human (human-to human transmission) | New case of human with confirmed plague attributed to direct transmission from remains of a person or animal that was infected with plague | - New case of human with confirmed plague attributed to direct transmission from remains of a person or animal that was infected with plague, where time period between the time of death of the plague victim and time of contact through which transmission occurred is specified.<br><br>- Isolation of <i>Y. pestis</i> by culture from body fluids from remains of a person or animal that was infected with plague, where time period between the time of death of the plague victim and the time of identification of <i>Y. pestis</i> in the body fluid is specified. |
| <b>Exclusion criteria</b> | None                                                                                                                        | Studies reporting only cases of plague attributed to consumption of infected meat, or cases of vector transmission such as fleas           | Studies looking at persistence of <i>Y. pestis</i> DNA in old cadavers that were already buried as well as persistence of <i>Y. pestis</i> in the soil or environmental surfaces                                                                                                                                                                                                                                                                                                                                                                                              |

87

88 **Search methods for identification of studies**

89 We conducted the search up to the 20 May 2019 and identified all relevant  
90 studies regardless of language, publication status, or publication date limit.

91 **Electronic searches.** We searched the following databases using the search  
92 terms and strategy described in S1 Appendix: MEDLINE (PubMed), Embase  
93 (accessed via Ovid), Science Citation Index (Web of Science), and Scopus.

94 **Searching other resources.** We also hand searched the reference lists of all  
95 eligible papers and contacted relevant researchers working in the field.

96 **Data collection and analysis**

97 **Selection of studies.** Two review authors (SJ and NS) independently screened  
98 all the abstracts retrieved by the search strategy using predefined eligibility

99 criteria and allocated studies to the inclusion criteria they meet, which might  
100 include more than one of the three review parts. We retrieved full-text copies for  
101 studies remaining after the first screening and applied the predefined inclusion  
102 criteria. Manuscripts in French, Russian, German and Chinese were assessed  
103 by one of the review authors or plague experts for whom mother tongue was  
104 one of these languages, or with the help of online translation. We resolved any  
105 disagreements in assessment through discussion. We listed all studies  
106 excluded after full-text assessment in the “Characteristics of excluded studies”  
107 table (S2 Appendix). We illustrated the study selection process in a PRISMA  
108 diagram (Figure 3).

109 **Data extraction and management.** Two review authors (SJ and NS) extracted  
110 data with data extraction forms. For each included study, we gathered  
111 information into “Characteristics of included studies” tables, comprising different  
112 data depending on the review part being addressed.

113 For studies in part one, we extracted data on setting, date, description of the  
114 index case, route of transmission mentioned by the study authors, methods  
115 used for contact tracing, contact definition, number of contacts identified and  
116 number of those infected, and any other relevant notes. For studies in part two,  
117 we extracted data on setting, date, source of infection, duration of exposure,  
118 route of transmission mentioned by the study authors, time from death of the  
119 infective human or animal cadaver to moment of exposure, basic characteristics  
120 of cases infected, and any other relevant notes. For studies in part three, we  
121 extracted data on setting, date, type of body fluid contaminated, duration of  
122 persistence of *Y. pestis* in body fluids between death and contact or *Y. pestis*  
123 identification, method of diagnosis of plague in the cadaver or of identification of

124 *Y. pestis* from body fluids, route of transmission mentioned by the study

125 authors, and any other relevant notes.

126 **Assessment of risk of bias.** Two review authors (SJ and NS) assessed

127 aspects of risk of bias of each included study, to consider the study limitations

128 when making conclusions about the results. We used a simple appraisal tool

129 comprising of six questions, modified from the quality appraisal tool developed

130 by Cho et al that has been used for assessing risk of bias of descriptive studies

131 [15] (S3 Appendix).

132 **Data synthesis.** No statistical analysis was possible, and data were

133 summarized narratively in text and tables for each of the three parts.

## 134 **Results**

### 135 **Result of the search**

136 We identified 644 studies (616 records from the literature search after removing

137 duplicates and 28 additional studies by hand search) and included 25 in the

138 review (Fig 3). Ten of them addressed the part one, 16 of them addressed the

139 part two and two of them addressed the part three, with three studies

140 addressing more than one part.

141



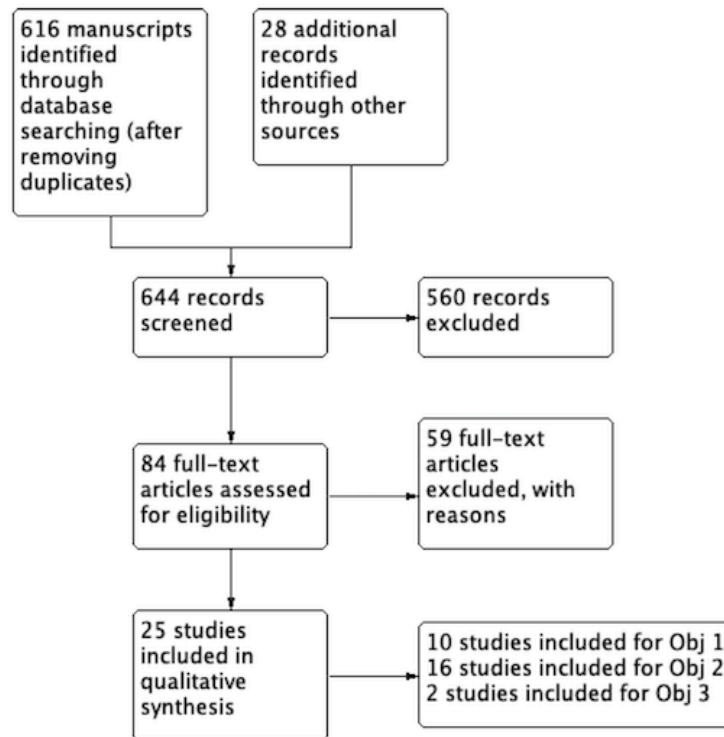

142

143 **Fig 3. Study flow diagram**

144 **1) Infectiousness of body fluids of people ill with plague**

145 **Study description.** Ten studies report cases of direct human to human  
146 transmission of plague demonstrating infectiousness of body fluids of people ill  
147 with plague (details in S4 and S5 Appendices). There are four studies  
148 describing plague cases from outbreaks or surveillance registries from the 20<sup>th</sup>  
149 century in Brazil [16], South Africa [17] and the Unites States [18,19] and six  
150 reporting more recent outbreaks between 1997 and 2017 in Madagascar [20–  
151 23], Uganda [24], and the Democratic Republic of the Congo [25]. Overall, the  
152 ten studies described a total of 2388 humans who became infected by plague  
153 attributed to direct contact with humans, including an outbreak in Madagascar  
154 with 1861 cases [20]. All the infected cases had primary pneumonic plague,  
155 except for four cases with septicaemic plague [17,25]; and six cases with mixed  
156 forms described with probable pneumonic affectation secondary to buboes [17].

157 **Risk of bias.** Six studies had adequate description of patient characteristics  
 158 such as age, gender and forms of plague, three had incomplete description,  
 159 and one study did not provide such information (Table 2, details in S5  
 160 Appendix). In four studies, there were efforts to trace contacts from the index  
 161 case, suggesting a certain level of contagiousness of the disease by assessing  
 162 infected and non-infected people from the same index cases. Laboratory  
 163 methods for confirming infected cases of plague were part of our inclusion  
 164 criteria, although only partially detailed in two studies. We judged that the route  
 165 of transmission and that the causality of it for plague infection was plausible in  
 166 eight studies. In two studies (including 50 cases), this was difficult to judge  
 167 based on the limited information provided.

168  
 169 **Table 2.** Risk of bias summary for studies on human to human transmission of  
 170 plague (part 1)

| Study ID            | Were patient characteristics adequately reported? | Was there some effort to trace all contacts from the index case? | Were the methods used for tracing contacts adequate? | Were the laboratory methods used for defining a confirmed case of plague reliable? | Was the route of transmission plausible? | Was the cause-effect of transmission plausible? |
|---------------------|---------------------------------------------------|------------------------------------------------------------------|------------------------------------------------------|------------------------------------------------------------------------------------|------------------------------------------|-------------------------------------------------|
| Almeida 1981        | Partial                                           | Unknown                                                          | Not applicable                                       | Yes                                                                                | No                                       | Unknown                                         |
| Begier 2006         | Yes                                               | Yes                                                              | Yes                                                  | Partial                                                                            | Yes                                      | Yes                                             |
| Bertherat 2011      | No                                                | Partial                                                          | Unknown                                              | Yes                                                                                | Yes                                      | Yes                                             |
| Evans 2018          | Yes                                               | Unknown                                                          | Not applicable                                       | Yes                                                                                | Yes                                      | Yes                                             |
| Kellogg 1920        | Yes                                               | Unknown                                                          | Not applicable                                       | Yes                                                                                | Yes                                      | Yes                                             |
| Kugeler 2015        | Partial                                           | Unknown                                                          | Not applicable                                       | Yes                                                                                | Unknown                                  | Unknown                                         |
| Rabaan 2019         | Partial                                           | Partial                                                          | Unknown                                              | Yes                                                                                | Yes                                      | Yes                                             |
| Ramasindrazana 2017 | Yes                                               | Yes                                                              | Yes                                                  | Yes                                                                                | Yes                                      | Yes                                             |
| Ratsitorahina 2000  | Yes                                               | Yes                                                              | Unknown                                              | Partial                                                                            | Yes                                      | Yes                                             |
| Richard 2015        | Yes                                               | Yes                                                              | Unknown                                              | Yes                                                                                | Yes                                      | Yes                                             |

171

172 **Findings.** Bloody sputum was described from the index case [22,24], from  
173 infected contacts [17,21], and from both [23]. The study authors attributed the  
174 route of transmission from the index cases to the infected contacts to  
175 ‘respiratory droplets’ or ‘direct transmission through infective cough droplets’ in  
176 four studies [19,20,22,24] or to ‘aerosolized bacteria spread through coughing’  
177 or ‘aerosol by droplets or by contaminated dust’ in two studies [23,25]. Two  
178 studies concluded that the infected cases were consistent with ‘human to  
179 human transmission’ without further details [18,21], and one study did not  
180 provide any suggestion for the route of transmission of plague [16]. There were  
181 not enough details provided by the study authors to understand whether the six  
182 mixed cases and the four cases of septicaemic plague were attributed to human  
183 to human transmission [17,25].

184 To assess how contagious are people sick with plague, we extracted data about  
185 people in contact with plague cases but who did not get infected. Across four  
186 studies that provided such information, 51 contacts got infected from five index  
187 cases (although some infected contacts acted as index cases for additional  
188 infected cases), and 341 contacts who were exposed to the five index cases did  
189 not develop plague [21–24]. The attack rate estimated by the study authors  
190 were 8%, 8.4% and 55% [22–24]. Transmission rate was assessed in a single  
191 study and reported to be 0.41 susceptible people per day [21]. While contacts  
192 did not receive chemoprophylaxis in one study [24], post-exposure prophylaxis  
193 was given to all contacts in one outbreak [22], to 39/41 contacts in another  
194 outbreak [23], and to 35 contacts with positive serology in a third outbreak [21].  
195 When described, infected contacts had been in close and prolonged exposure

196 to index cases, such as close family members, main care takers including  
197 nurses and physicians, or other family members or villagers staying at the same  
198 house as the plague cases [17,19,22–24]. Four studies from South Africa and  
199 Madagascar attributed plague transmission to activities related to funerals, such  
200 as ‘preparing bodies for funerals’ or ‘active participation in the funerals’ [17,20–  
201 22]. Evans et al added that ‘the disease is transmitted to relatives, friends, or  
202 caregivers but not to more loosely associated contacts’ [17].  
203 Contacts exposed to plague but who were not infected included family  
204 members who slept in the same bed as the plague patient until the night before  
205 their death [23,24] including persons who slept with their heads at a distance of  
206 less than two meters from the coughing plague patient [24].

207 **Summary:** The evidence shows that direct transmission through infective  
208 cough droplets from people ill with plague may occur, but sometimes this is only  
209 after close and prolonged exposure. We found no publication describing  
210 interhuman transmission of plague through other body fluids such as blood  
211 (although respiratory droplets from pneumonic cases come from grossly bloody  
212 sputum), urine, faeces, sweat or bubo pus.

## 213 **2) Plague infection acquired from human and animal cadavers**

214 **Description of studies.** We included 16 studies (details in S6 and S7  
215 Appendices), all retrospective case reports or series published between 1930  
216 and 2019. In total, 250 cases of plague were described from seven countries:  
217 China (n=114) [26–28], the United States (n=96) [8,29–35], Libya (n=17) [36],  
218 Kazakhstan (n=12) [37], Madagascar (n=9) [22], South Africa (n=1) [38], and  
219 Saudi Arabia (n=1) [39]. More males were infected, with a wide age range from  
220 1 to 69 years. There were 125 cases diagnosed with primary bubonic plague

221 (mostly axillary buboes), 70 with primary pneumonic plague, eight with primary  
 222 septicaemic plague and two with primary intestinal plague.

223 **Risk of bias.** Most of the included studies adequately described the main  
 224 characteristics of participants (Table 3, details in S7 Appendix). Efforts to trace  
 225 all contacts from the index case was unknown for 12 studies. This means that  
 226 there was no information on whether other persons were exposed to the source  
 227 of infection without getting infected, which makes judgment on assessing  
 228 contagiousness of cadavers difficult. In eight studies, laboratory methods used  
 229 for defining confirmed cases of plague were unknown or partial for most of the  
 230 cases described by each study. In these cases, plague diagnosis was however  
 231 highly suspected due to clinical and epidemiological data. In 11 studies, the  
 232 route of transmission and the cause-effect from the source of infection to the  
 233 infected person were highly plausible. In the remaining studies, while the source  
 234 and route of transmission can eventually be plausible, there was a lack of  
 235 information to make this judgment, and in some case series, transmission via  
 236 fleas might not have been fully excluded for all cases.

237

238 **Table 3.** Risk of bias summary for studies on plague acquired from human or  
 239 animal cadavers (part 2)

| Study ID                      | Were patient characteristics adequately reported? | Was there some effort to trace all contacts from the index case? | Were the methods used for tracing contacts adequate? | Were the laboratory methods used for defining a confirmed case of plague reliable? | Was the route of transmission plausible? | Was the cause-effect of transmission plausible? |
|-------------------------------|---------------------------------------------------|------------------------------------------------------------------|------------------------------------------------------|------------------------------------------------------------------------------------|------------------------------------------|-------------------------------------------------|
| CDC 1992                      | Yes                                               | Unknown                                                          | Not applicable                                       | Yes                                                                                | Yes                                      | Yes                                             |
| Christie 1980 - case series 1 | Partial                                           | Unknown                                                          | Not applicable                                       | Partial                                                                            | Yes                                      | Yes                                             |
| Christie 1980 - case series 2 | Partial                                           | Unknown                                                          | Not applicable                                       | Partial                                                                            | Partial                                  | Partial                                         |

|                              |         |         |                |         |         |         |
|------------------------------|---------|---------|----------------|---------|---------|---------|
| <b>Gage 2000</b>             | Yes     | Unknown | Not applicable | Yes     | Yes     | Yes     |
| <b>Ge 2015 - case report</b> | Yes     | Yes     | Yes            | Yes     | Yes     | Yes     |
| <b>Ge 2015 - case series</b> | Partial | Unknown | Not applicable | Unknown | Partial | Partial |
| <b>Kartman 1960</b>          | Partial | Unknown | Not applicable | No      | Yes     | Yes     |
| <b>Kartman 1970</b>          | Partial | Unknown | Not applicable | Unknown | Yes     | Yes     |
| <b>Kugeler 2015</b>          | No      | Unknown | Not applicable | Unknown | Partial | Partial |
| <b>Mitchell 1930</b>         | Yes     | Unknown | Not applicable | Unknown | Yes     | Yes     |
| <b>Poland 1973</b>           | Yes     | Yes     | Yes            | Yes     | Yes     | Yes     |
| <b>Ratsitorahina 2000</b>    | Yes     | Yes     | Unknown        | Yes     | Yes     | Partial |
| <b>Saeed 2005</b>            | Yes     | Yes     | Yes            | Yes     | Yes     | Yes     |
| <b>Sagiev 2019</b>           | No      | Unknown | Not applicable | Unknown | Unknown | Unknown |
| <b>Von Reyn 1976</b>         | Yes     | Yes     | Yes            | Yes     | Yes     | Yes     |
| <b>Wong 2009</b>             | Yes     | Yes     | Yes            | Yes     | Yes     | Yes     |
| <b>Wu 2009</b>               | Yes     | Unknown | Not applicable | Yes     | Yes     | Partial |
| <b>Zhang 2007</b>            | Partial | Unknown | Not applicable | Partial | Unknown | Partial |

240

241 **Findings.** Human cadavers were the source of exposure in two studies  
242 including 10 cases [22,38] and in a third study of 32 cases with no  
243 disaggregated data between contact with alive humans and human cadavers  
244 [28]. In the remaining studies, the exposure was animal cadavers including  
245 camels, goats, cats, bobcat, fox, coyote, mountain lion, Tibetan sheep,  
246 marmots, dogs, rabbits, squirrels, and other rodents. In most cases, the type of  
247 exposure consisted of activities related with the animal cadaver such as killing  
248 the animal, skinning the cadaver, or performing autopsy of the infected animal,  
249 which require a relatively long and close exposure with the source of infection.  
250 It was not possible to disaggregate data on the cause of transmission between  
251 handling or consuming the infected animal in three studies (56 cases)  
252 [27,28,36], to affirm whether plague transmission was due to the contact with a

253 human or animal cadaver or to any alternative routes in four studies (45 cases)  
254 [22,28,29,36] and to ascertain whether plague was transmitted from a cadaver  
255 or from interhuman contact in three studies (44 cases) [22,28,36].  
256 Only one study directly specified the duration of time between the death of the  
257 infected animal and the start of exposure, being around 35 hours [8]. Three  
258 studies gave enough details to affirm that the time of exposure was within 24  
259 hours following the death of the infected animal [22,34,39]. In 26 additional  
260 cases from three studies, we can deduce an immediate exposure from infected  
261 animals that were just killed by the cases who developed plague [31,32,36].  
262 Among cases with bubonic plague, five cases from four studies had open skin  
263 lesions while handling the cadaver with bare hands [32,34,35,39]. Other  
264 persons who had no skin lesions were exposed to the same source of infection  
265 but were not infected [34,35]. While another study associated the route of  
266 transmission to “direct contact from infectious body fluids of the cat cadaver”  
267 [30], there is no further details of the entry point of the plague bacilli in the  
268 remaining cases, other than “direct handling” of the cadavers. Most cases of  
269 bubonic plague were axillary, which is consistent with the inoculation of *Y.*  
270 *pestis* through cuts in the hands or arms. Among cases who developed primary  
271 pneumonic plague, one study attributed transmission via inhalation of aerosols  
272 generated while handling the cadaver during the necropsy, and another study  
273 mentioned “exposure to aerosols” [8,26]. A third study attributed the pneumonic  
274 infection as a result of “active participation in the funeral ceremonies” without  
275 providing further details [22].  
276 **Summary.** Direct skin contact with blood could cause bubonic and septicaemic  
277 plague. The risk is increased in people with cuts or skin abrasions. We do not

278 know about infectiousness of other body fluids. Potentially pneumonic plague  
279 could be transmitted by actions that provoke aerosolization of infected body  
280 fluids, but these will require considerable manipulation of the cadaver.

281 **3) Infectiousness of body fluids of animal or human cadavers, including**  
282 **length of cadaver infectiousness**

283 We identified two studies that detailed the length of infectiousness of plague-  
284 infected animals and none in human cadavers. One experimental study  
285 conducted in Madagascar five decades ago aimed to isolate *Y. pestis* from  
286 rodent cadavers that died from septicaemic plague and were buried in laterite  
287 alone or in laterite enriched with manure to simulate local conditions [40]. *Y.*  
288 *pestis* was successfully isolated after five and ten days but failed to be isolated  
289 at 15 days after death of the rodents. The second study, already described  
290 above for objective 2, reported the case of a wildlife biologist who has been in  
291 contact with a mountain lion around 35 hours after the death of the animal [8].  
292 The time of death was identified from a 'mortality signal' transmitted from the  
293 animal's radio-collar after six hours of no movement. *Y. pestis* was isolated by  
294 culture and subtyped by pulsed-field gel electrophoresis from the animal's  
295 tissues. The same strain was isolated from the biologist, supporting the  
296 mountain lion as the source of the biologist's infection. Both studies were  
297 judged to be at low risk of introducing bias.

298 In summary, we do not know for how long *Y. pestis* can survive in body fluids of  
299 people that die from plague, and we thus do not know for how long the cadaver  
300 is contagious. One case of infection from an animal 35 hours after death means  
301 whatever the size of the risk, it may well extend beyond 24 hours.



## 302 **Discussion**

303 Pandemics of plague reported historically suggest that the risk of human-to-  
304 human transmission in this context is high for pneumonic plague but this has  
305 been contested.

306 Indeed, a systematic review summarized data from historical records and  
307 contemporary experience, and based on qualitative analysis concluded that  
308 “pneumonic plague is not easily transmitted from one person to another” [41].  
309 Quantitative assessment of transmissibility of plague has also been performed,  
310 using mathematical models based on historical data [42,43]. Our data, which  
311 include most recent outbreaks (older reports usually do not provide enough  
312 information to allow inclusion in the review) support that pneumonic plague is  
313 transmissible from human to human, sometimes only after close and prolonged  
314 exposure. Historical records that were not eligible for this review constitute a  
315 useful additional source of information related to transmissibility of pneumonic  
316 plague. Some of them reported experiments that demonstrated the isolation of  
317 *Y. pestis* from sputum of people sick with pneumonic plague [44,45].

318 Looking at the evidence gathered in this review, respiratory secretions  
319 consisting of blood-stained sputum were clearly reported as the source of  
320 plague transmission. From studies describing plague acquired from cadavers,  
321 the type of contaminated body fluids causing plague transmission was not  
322 clearly described, although it could mostly be assumed to be blood. Indeed, the  
323 activities described to be the cause of infection included skinning of the animal,  
324 cutting carcasses, flaying, post-mortem examinations, all of them involving  
325 contact with blood. However, it could potentially be linked with other body fluids  
326 infected such as urine, faeces, gastric content or bubo pus. We did not find

327 evidence that the disease can be transmitted by body fluids other than sputum  
328 and blood. In addition, we do not know for how long *Y. pestis* survive in the  
329 body fluids, and for how long the cadaver is contagious. From real life  
330 situations, we found only one study describing plague transmission from an  
331 animal that was dead for around 35 hours before the first contact with the  
332 infected human.

333 The included studies described two main routes of transmission. The first one is  
334 the inhalation of particles, which can result in pneumonic plague. From alive  
335 sick persons, contaminated droplets are generated by cough associated with  
336 bloody sputum. From cadavers, contaminated droplets will no longer be  
337 produced by cough but can be generated from body fluids – mainly blood – by  
338 handling the cadaver, for example when performing a necropsy or when  
339 preparing body for funerals. In any case, a close and prolonged exposure is  
340 probably needed for transmission of the disease. The second route of  
341 transmission is through handling cadavers, described for prolonged exposure  
342 involving invasive procedures. Skin cuts or abrasion in the hands are described  
343 in some of the persons who got infected. In other studies, this was not  
344 commented on. Thus, it is difficult to know whether transmission through intact  
345 skin can occur, although from first principles this seems unlikely. We did not find  
346 any study describing plague acquired through contact with mucosa.

347 In some cases, it is difficult to discriminate between the different routes of  
348 transmission from plague-infected human cadavers (body fluids, clothing  
349 contaminated with body fluids, or fleas). In part 1, we showed that human-to-  
350 human transmission was possible. All infected cases presented primary  
351 pneumonic plague, which suggests inhalation of particles to be the source of

352 infection, while fleas were very unlikely to be involved. In part 2, we reported  
353 plague transmission from human and animal cadavers. Most cases were  
354 described from animals, with no involvement of potential contaminated clothing  
355 in the transmission of the disease. It is difficult to totally exclude the possibility  
356 that some of the infected cases presenting with bubonic plague were  
357 contaminated by fleas. While most cases were contaminated from animals with  
358 no involvement of clothes that could contain fleas, there could have been fleas  
359 on the corpses. However, our inclusion criteria limited the likelihood of plague  
360 transmission by fleas and we appraised the plausibility of the route of  
361 transmission (human to human or from corpses) for each included study. We  
362 excluded cases related with flea or unknown transmission [29] and highlighted  
363 when there was evidence of absence of flea bite [32], or at contrary, when  
364 transmission via flea might not have been fully excluded [33].  
365 In conclusion, there is risk of plague transmission from human cadavers (Fig 4).  
366 Inhalation of respiratory droplets produced by intense manipulation of the  
367 cadaver could result in pneumonic plague, probably following close and  
368 prolonged exposure. Direct skin contact of infected body fluids (blood but  
369 unclear for other body fluids) could cause bubonic plague and eventually  
370 septicaemic plague when the persons present cuts in their hands.  
371

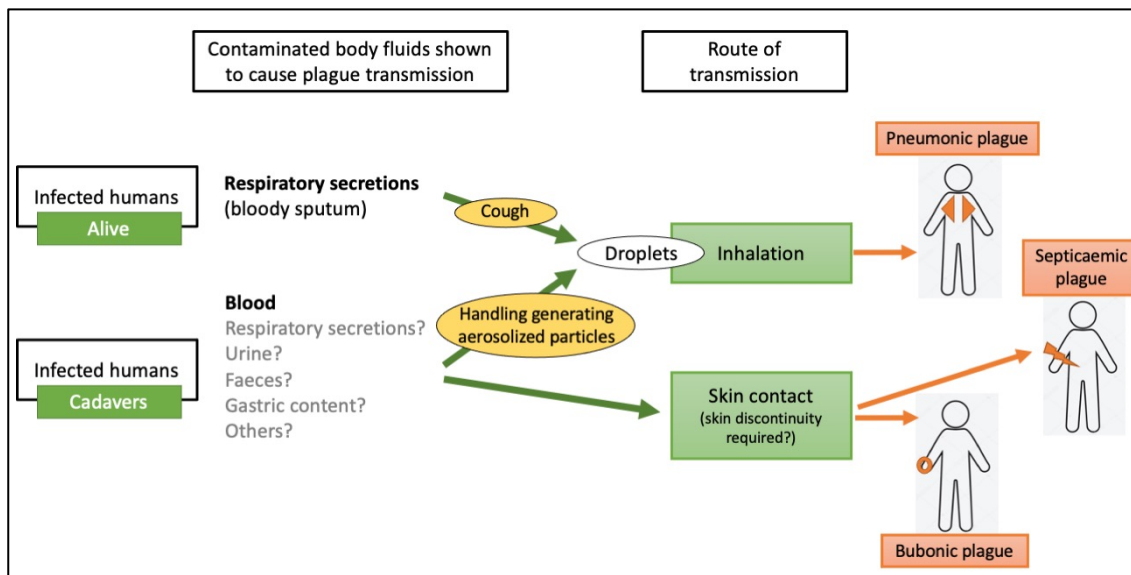

372

373 **Fig 4. Summary of the transmission routes evidenced by the literature**

374 **gathered in this review**

## 375 **Acknowledgments**

376 We acknowledge Xin Wang for retrieving the full text manuscripts in Chinese,  
377 for summarizing the Chinese manuscripts so that SJ and NS could assess  
378 eligibility of the study, and for conducting data extraction of the two included  
379 Chinese studies. We also acknowledge Vladimir Dubyanskiy for retrieving some  
380 of the full text manuscripts in Russian and for providing a brief summary of the  
381 Russian papers in order to assess eligibility. We are grateful to Vittoria Lutje,  
382 the Information Retrieval Specialist of the Cochrane Infectious Diseases Group  
383 for her help with the literature search strategy and for conducting the search.

## 384 **References**

- 385 1. Rasmussen S, Allentoft ME, Nielsen K, Nielsen R, Kristiansen K,  
386 Willerslev E. Early Divergent Strains of *Yersinia pestis* in Eurasia Article  
387 Early Divergent Strains of *Yersinia pestis* in Eurasia 5,000 Years Ago.  
388 *Cell*. 2015;163:571–82.
- 389 2. World Health Organization. Interregional meeting on prevention and  
390 control of plague Interregional meeting on prevention and control. 2008.
- 391 3. World Health Organization SEARO. Operational Guidelines on Plague  
392 Surveillance, Diagnosis, Prevention and Control. 2009.
- 393 4. Eisen RJ, Gage KL. Review article Adaptive strategies of *Yersinia pestis*  
394 to persist during inter-epizootic and epizootic periods. *Vet Res*.  
395 2009;40:1–14.
- 396 5. Pollitzer R. Plague, World Health Organization Monographic Series. 1954.
- 397 6. Centers for Disease Control and Prevention. Morbidity and Mortality  
398 Weekly Report. Fatal Laboratory-Acquired Infection with an Attenuated

- 399            *Yersinia pestis* Strain - Chicago, Illinois, 2009. Vol. 60. 2011.
- 400    7.    Weniger BG, Warren AJ, Forseth V, Creelman T, Gorton J, Barnes AM.  
401            Human Bubonic Plague Transmitted by a Domestic Cat Scratch. JAMA.  
402            1984;251(7):927–8.
- 403    8.    Wong D, Wild MA, Walburger MA, Higgins CL, Callahan M, Czarnecki LA,  
404            et al. Primary Pneumonic Plague Contracted from a Mountain Lion  
405            Carcass. Clin Infect Dis. 2009;49:e33-8.
- 406    9.    Centers for Disease Control and Prevention. Plague [Internet]. 2019 [cited  
407            2019 Apr 15]. Available from: <https://www.cdc.gov/plague/index.html>
- 408    10.    Bramanti B, Stenseth NC, Walloe L, Lei X. Plague: a disease which  
409            changed the path of human civilization. In: Yang R, Anisimov A, editors.  
410            *Yersinia pestis* : Retrospective and Perspective. Springer Nature; 2016. p.  
411            11–5.
- 412    11.    Arifuzzaman M, Ang WYG, Choi HW, Nilles ML, John ALS, Abraham SN.  
413            Necroptosis of infiltrated macrophages drives *Yersinia pestis* dispersal  
414            within buboes. JCI Insight. 2018;3(18):e122188.
- 415    12.    Prentice MB, Rahalison L. Plague. Lancet. 2007;369:1196–207.
- 416    13.    Center for Infectious Disease Research and Policy. Plague. Agent and  
417            pathogenesis [Internet]. 2013 [cited 2019 Apr 15]. Available from:  
418            <http://www.cidrap.umn.edu/infectious-disease-topics/plague>
- 419    14.    Jullien S, Silva NL da, Garner P. Risk of plague transmission from human  
420            cadavers [Internet]. National Institute for Health Research. 2019 [cited  
421            2019 Jan 13]. Available from:  
422            [https://www.crd.york.ac.uk/PROSPERO/display\\_record.php?RecordID=1](https://www.crd.york.ac.uk/PROSPERO/display_record.php?RecordID=133786)  
423            33786

- 424 15. Cho MK, Bero LA. Instruments for Assessing the Quality of Drug Studies  
425 Published in the Medical Literature. *JAMA*. 1994;272(2):101–4.
- 426 16. Almeida C, Almeida A, Vieira JB, Guida U, Butler T. Plague in Brazil  
427 during two years of bacteriological and serological surveillance. *Bull*  
428 *World Health Organ*. 1981;59(4):591–7.
- 429 17. Evans CM, Egan JR, Hall I. Pneumonic Plague in Johannesburg, South  
430 Africa, 1904. *Emerg Infect Dis*. 2018;24(1):95–102.
- 431 18. Kugeler KJ, Staples JE, Hinckley AF, Gage KL, Mead PS. Epidemiology  
432 of Human Plague in the United States, 1900-2012. *Emerg Infect Dis*.  
433 2015;21(1):16–22.
- 434 19. Kellogg W. An epidemic of pneumonic plague. *Am J Public Health*.  
435 1920;10:599–605.
- 436 20. Rabaan AA, Al-ahmed SH, Alsuliman SA, Aldrazi FA, Alfouzan WA,  
437 Haque S. The rise of pneumonic plague in Madagascar: current plague  
438 outbreak breaks usual seasonal mould. *J Med Microbiol*. 2019;68:292–  
439 302.
- 440 21. Ramasindrazana B, Andrianaivoarimanana V, Rakotondramanga JM,  
441 Birdsell DN, Ratsitorahina M, Rajerison M. Pneumonic Plague  
442 Transmission, Moramanga, Madagascar, 2015. *Emerg Infect Dis*.  
443 2017;23(3):521–4.
- 444 22. Ratsitorahina M, Chanteau S, Rahalison L, Ratsifasoamanana L, Boisier  
445 P. Early report Epidemiological and diagnostic aspects of the outbreak of  
446 pneumonic plague in Madagascar. *Lancet*. 2000;355:111–3.
- 447 23. Richard V, Riehm JM, Herindrainy P, Soanandrasana R, Ratsitorahina M,  
448 Rakotomanana F, et al. Pneumonic Plague Outbreak, Northern

- 449 Madagascar, 2011. *Emerg Infect Dis.* 2015;21(1):8–15.
- 450 24. Begier EM, Asiki G, Anywaine Z, Yockey B, Schriefer ME, Aleti P, et al.  
451 Pneumonic Plague Cluster, Uganda, 2004. *Emerg Infect Dis.*  
452 2006;12(3):460–7.
- 453 25. Bertherat E, Thullier P, Shako JC, England K, Koné M, Arntzen L, et al.  
454 Lessons Learned about Pneumonic Plague Diagnosis from 2 Outbreaks,  
455 Democratic Republic of the Congo. *Emerg Infect Dis.* 2011;17(5):778–84.
- 456 26. Ge P, Xi J, Ding J, Jin F, Zhang H, Guo L, et al. Primary case of human  
457 pneumonic plague occurring in a Himalayan marmot natural focus area  
458 Gansu Province, China. *Int J Infect Dis.* 2015;33:67–70.
- 459 27. Wu K, Wang Y, Wang M. Epidemiologic analysis on Tibetan sheep  
460 plague from 1975 to 2005 in Qinghai Province. *Chinese J Endem.*  
461 2009;28(6):665–7.
- 462 28. Zhang H, Wang S, Wu D, Liang X. Dynamic analysis of human plague  
463 epidemic situation in Gansu. *Chinese J Endem.* 2007;26(1):82–4.
- 464 29. Centers for Disease Control and Prevention. Plague - United States,  
465 1992. Vol. 41. 1992.
- 466 30. Gage KL, Dennis DT, Orloski KA, Ettestad P, Brown TL, Reynolds PJ, et  
467 al. Cases of Cat-Associated Human Plague in the Western US, 1977 –  
468 1998. *Clin Infect Dis.* 2000;30:893–900.
- 469 31. Kartman L. Historical and oecological observations on plague in the  
470 United States. *Trop Geogr Med.* 1970;22:257–75.
- 471 32. Kartman L. The role of rabbits in sylvatic plague epidemiology, with  
472 special attention to human cases in New Mexico and use of the  
473 fluorescent antibody technique for detection of *Pasteurella pestis* in field



- 474 specimens. Zoonoses Res. 1960;1(1):1–27.
- 475 33. Kugeler KJ, Staples JE, Hinckley AF, Gage KL, Mead PS. Epidemiology  
476 og Human Plague in the United States, 1900-2012. Emerg Infect Dis.  
477 2015;21(1):16–22.
- 478 34. Poland JD, Barnes AM, Herman JJ. Human bubonic plague from  
479 exposure to a naturally infected wild carnivore. Am J Epidemiol.  
480 1973;97(5):332–7.
- 481 35. Von Reyn CF, Barnes AM, Weber NS, Quan T, Dean AJ. Bubonic plague  
482 from direct exposure to a naturally infected wild coyote. Am J Trop Med  
483 Hyg. 1976;25(4):626–9.
- 484 36. Christie A, Chen T, Elberg SS. Plague in Camels and Goats: Their Role in  
485 Human Epidemics. J Infect Dis. 1980;141(6):22–4.
- 486 37. Sagiev Z, Meka-Mechenko T, Kunitsa T, Musagalieva R, Ismailova A,  
487 Kulbaeva M, et al. Diseases of Human Plague in 1974 - 2003 in  
488 Kazakhstan. Ekoloji. 28(107):39–48.
- 489 38. Mitchell J. Epizootic among veld rodents in De Aar and neighbouring  
490 districts of the Northern Cape province. J Hyg (Lond). 1930;29(4):394–  
491 414.
- 492 39. Saeed AA Bin, Al-hamdan NA, Fontaine RE. Plague from Eating Raw  
493 Camel Liver. Emerg Infect Dis. 2005;11(9):1456–7.
- 494 40. Brygoo E, Dodin A. Telluric and burrow plague. Malagasy data. [A propos  
495 de la peste tellurique et de la peste de fouissement. Données  
496 Malgaches]. Bull la Société Pathol Exot. 1965;1:14–7.
- 497 41. Kool JL. Risk of Person-to-Person Transmission of Pneumonic Plague.  
498 Healthc Epidemiol. 2005;40:1166–72.

- 499 42. Didelot X, Whittles LK, Hall I. Model-based analysis of an outbreak of  
500 bubonic plague in Cairo in 1801. *J R Soc Interface*. 2017;14:20170160.
- 501 43. Whittles LK, Didelot X. Epidemiological analysis of the eyam plague  
502 outbreak of 1665–1666. *Proc R Soc B Biol Sci*. 2016;283:20160618.
- 503 44. Teh W, Chun W, Pollitzer R. Plague in Manchuria: I Observations made  
504 during and after the second Manchurian plague epidemic of 1920-21. *J*  
505 *Hyg (Lond)*. 1923;21:307–58.
- 506 45. Strong R, Teague O. Studies on pneumonic plague and plague  
507 immunisation. II The method of transmission of the infection in pneumonic  
508 plague and manner of spread of the disease during the epidemic. *Philipp*  
509 *J Trop Med*. 1912;7:137–56.
- 510

- 511 **Supporting information**
- 512 **S1 Appendix. Search strategy**
- 513 **S2 Appendix. Characteristics of excluded studies**
- 514 **S3 Appendix. Adapted quality appraisal tool**
- 515 **S4 Appendix. Summary of studies describing infectiousness of different**
- 516 **body fluids of people ill with plague (review part 1)**
- 517 **S5 Appendix. Characteristics of included studies for infectiousness of**
- 518 **different body fluids of people ill with plague (review part 1)**
- 519 **S6 Appendix. Summary of studies describing plague acquired from**
- 520 **human and animal cadavers (review part 2)**
- 521 **S7 Appendix. Characteristics of included studies for plague acquired from**
- 522 **human and animal cadavers (review part 2)**
